# Supplementary material
Source: publisher figshare collection journal article supplement (https://gsajournals.figshare.com/ndownloader/files/26480459)
Supplement: Supplementary file 1 [file 26480459]

## Sheet: Gaps and scaffolds, 29 chr
SeqID	Length	gaps	Hi-C scaffold
omya01	95772356	15	7		Total gaps: 489
omya02	103806877	12	7		Total tigs: 1228
omya03	85311031	8	5
omya04	93169007	9	9
omya05	100798064	25	6
omya06	101096859	13	6
omya07	90918291	25	17
omya08	91622588	14	6
omya09	79455637	20	8
omya10	87811138	29	10
omya11	86280908	17	6
omya12	102853256	19	9
omya13	73332040	20	11
omya14	85147650	17	9
omya15	81569517	18	9
omya16	78541548	17	9
omya17	95212422	24	13
omya18	74657750	25	6
omya19	67237266	15	7
omya20	46616863	12	4
omya21	64935962	20	11
omya22	52474311	8	4
omya23	62880378	4	5
omya24	45930806	10	5
omya25	91651413	13	2
omya26	51113553	12	4
omya27	51556237	7	4
omya28	43716683	4	2
omya29	47748341	9	8
Total	2233218752	441	209
min	43716683	4	2
max	103806877	29	17
average	7.70075e+07	15.2069	7.2069
unplaceed scaffolds	108453520
scaffold_370	130661	0
scaffold_491	85853	0
scaffold_598	68655	0
scaffold_509	82240	0
scaffold_359	137370	0
scaffold_682	59301	0
scaffold_250	360411	0
scaffold_304	209243	0
scaffold_303	209781	0
scaffold_792	50021	0
scaffold_422	103386	0
scaffold_229	553900	0
scaffold_265	285447	0
scaffold_605	67423	0
scaffold_570	72700	0
scaffold_260	310465	0
scaffold_403	108808	0
scaffold_779	50828	0
scaffold_383	122820	0
scaffold_723	54680	0
scaffold_759	52256	0
scaffold_378	125538	0
scaffold_823	46704	0
scaffold_566	72945	0
scaffold_901	36369	0
scaffold_725	54428	0
scaffold_848	44591	0
scaffold_833	46049	0
scaffold_542	77519	0
scaffold_498	84774	0
scaffold_857	43723	0
scaffold_481	87812	0
scaffold_615	66790	0
scaffold_440	97985	0
scaffold_784	50485	0
scaffold_363	135021	0
scaffold_539	77780	0
scaffold_248	371972	0
scaffold_699	56779	0
scaffold_497	84788	0
scaffold_173	928286	0
scaffold_789	50205	0
scaffold_576	72069	0
scaffold_637	64613	0
scaffold_743	53063	0
scaffold_788	50217	0
scaffold_620	66311	0
scaffold_707	55746	0
scaffold_794	49974	0
scaffold_532	78961	0
scaffold_356	140274	0
scaffold_815	47738	0
scaffold_278	257264	0
scaffold_760	52151	0
scaffold_755	52449	0
scaffold_812	48305	0
scaffold_277	258486	0
scaffold_703	55963	0
scaffold_298	217504	0
scaffold_515	81827	0
scaffold_164	1079841	1
scaffold_718	55044	0
scaffold_415	105121	0
scaffold_916	20663	0
scaffold_875	40506	0
scaffold_512	82151	0
scaffold_617	66683	0
scaffold_467	90766	0
scaffold_307	204828	1
scaffold_645	63321	0
scaffold_445	97014	0
scaffold_460	93020	0
scaffold_604	67436	0
scaffold_188	871358	0
scaffold_674	60570	0
scaffold_845	45032	0
scaffold_465	91061	0
scaffold_311	198720	1
scaffold_582	70886	0
scaffold_690	57910	0
scaffold_795	49928	0
scaffold_871	41206	0
scaffold_629	65890	0
scaffold_471	90136	0
scaffold_263	294106	1
scaffold_898	37893	0
scaffold_287	241564	0
scaffold_420	103772	0
scaffold_554	75678	0
scaffold_745	53007	0
scaffold_334	155961	1
scaffold_579	71354	0
scaffold_387	121989	2
scaffold_740	53228	0
scaffold_608	67228	0
scaffold_895	38263	0
scaffold_476	88652	0
scaffold_388	120378	0
scaffold_459	93106	0
scaffold_325	169868	0
scaffold_606	67416	0
scaffold_870	41275	0
scaffold_787	50374	0
scaffold_802	49294	0
scaffold_893	38371	0
scaffold_594	69189	0
scaffold_321	177119	0
scaffold_752	52577	0
scaffold_840	45439	0
scaffold_664	61116	0
scaffold_216	624742	1
scaffold_221	581096	0
scaffold_400	110863	0
scaffold_632	65658	0
scaffold_621	66265	0
scaffold_836	45842	0
scaffold_874	40536	0
scaffold_657	62018	0
scaffold_340	150573	0
scaffold_670	60723	0
scaffold_822	46705	0
scaffold_825	46581	0
scaffold_226	566240	0
scaffold_595	69186	0
scaffold_544	77457	0
scaffold_346	147786	0
scaffold_729	54173	0
scaffold_472	89681	0
scaffold_727	54275	0
scaffold_503	83072	0
scaffold_887	39315	0
scaffold_347	146588	0
scaffold_536	77982	0
scaffold_671	60651	0
scaffold_861	42857	0
scaffold_541	77597	0
scaffold_650	62871	0
scaffold_310	199767	0
scaffold_373	128363	0
scaffold_623	66101	0
scaffold_824	46699	0
scaffold_240	431231	0
scaffold_756	52441	0
scaffold_399	111414	0
scaffold_496	85183	0
scaffold_327	165328	0
scaffold_284	244422	0
scaffold_886	39338	0
scaffold_631	65671	0
scaffold_749	52707	0
scaffold_872	40937	0
scaffold_552	75985	0
scaffold_734	53943	0
scaffold_273	263776	0
scaffold_905	32735	0
scaffold_611	67143	0
scaffold_658	61710	0
scaffold_345	147973	0
scaffold_651	62707	0
scaffold_739	53387	0
scaffold_918	18911	0
scaffold_914	21198	0
scaffold_635	65448	0
scaffold_780	50810	0
scaffold_520	80988	0
scaffold_810	48776	0
scaffold_87	2745910	1
scaffold_819	47202	0
scaffold_750	52678	0
scaffold_863	42707	0
scaffold_483	86938	0
scaffold_527	79825	0
scaffold_663	61258	0
scaffold_732	54009	0
scaffold_502	83095	0
scaffold_832	46176	0
scaffold_847	44634	0
scaffold_562	73454	0
scaffold_313	195254	0
scaffold_442	97813	0
scaffold_257	326358	0
scaffold_425	102239	0
scaffold_828	46496	0
scaffold_742	53072	0
scaffold_412	105708	0
scaffold_556	74810	0
scaffold_613	67041	0
scaffold_661	61341	0
scaffold_569	72707	0
scaffold_831	46316	0
scaffold_511	82160	0
scaffold_218	614079	0
scaffold_907	31915	0
scaffold_222	579594	0
scaffold_730	54164	0
scaffold_408	106154	0
scaffold_468	90601	0
scaffold_266	281602	0
scaffold_501	83591	0
scaffold_559	74205	0
scaffold_568	72749	0
scaffold_830	46447	0
scaffold_668	60896	0
scaffold_279	256012	0
scaffold_702	56112	0
scaffold_904	34502	0
scaffold_477	88551	0
scaffold_654	62587	0
scaffold_801	49330	0
scaffold_475	88827	0
scaffold_672	60642	0
scaffold_689	57917	0
scaffold_685	58597	0
scaffold_710	55572	0
scaffold_259	317248	0
scaffold_417	104529	0
scaffold_834	46014	0
scaffold_397	112470	0
scaffold_583	70742	0
scaffold_625	66010	0
scaffold_612	67071	0
scaffold_643	63630	0
scaffold_215	631356	0
scaffold_296	224729	0
scaffold_379	124963	0
scaffold_195	817877	1
scaffold_748	52744	0
scaffold_455	93948	0
scaffold_578	71406	0
scaffold_312	196600	0
scaffold_677	59960	0
scaffold_436	98706	0
scaffold_354	140667	0
scaffold_522	80763	0
scaffold_808	48893	0
scaffold_521	80944	0
scaffold_751	52616	0
scaffold_394	114294	0
scaffold_385	122212	0
scaffold_456	93578	0
scaffold_161	1125905	2
scaffold_369	130945	0
scaffold_374	128338	0
scaffold_414	105138	0
scaffold_326	167894	0
scaffold_909	28300	0
scaffold_708	55627	0
scaffold_434	99895	0
scaffold_675	60207	0
scaffold_251	357920	0
scaffold_543	77482	0
scaffold_453	96219	0
scaffold_551	76194	0
scaffold_429	101565	0
scaffold_517	81355	0
scaffold_919	16956	0
scaffold_389	120338	0
scaffold_470	90322	0
scaffold_494	85431	0
scaffold_713	55279	0
scaffold_314	194312	0
scaffold_196	813722	0
scaffold_573	72436	0
scaffold_449	96615	0
scaffold_232	510155	0
scaffold_239	444543	0
scaffold_706	55752	0
scaffold_457	93501	0
scaffold_644	63458	0
scaffold_882	39594	0
scaffold_534	78253	0
scaffold_908	30918	0
scaffold_437	98619	0
scaffold_319	184161	0
scaffold_305	208685	0
scaffold_842	45307	0
scaffold_396	113066	0
scaffold_555	75599	0
scaffold_513	82004	0
scaffold_746	52941	0
scaffold_223	571058	0
scaffold_767	51491	0
scaffold_350	144079	0
scaffold_120	1874749	3
scaffold_575	72084	0
scaffold_402	110234	0
scaffold_144	1484196	1
scaffold_205	721750	0
scaffold_197	802530	0
scaffold_535	78124	0
scaffold_841	45346	0
scaffold_315	191184	0
scaffold_899	37569	0
scaffold_844	45133	0
scaffold_331	158634	0
scaffold_156	1258143	2
scaffold_254	346706	0
scaffold_765	51523	0
scaffold_758	52338	0
scaffold_558	74634	0
scaffold_638	64234	0
scaffold_351	143538	0
scaffold_641	63845	0
scaffold_653	62623	0
scaffold_330	159840	0
scaffold_711	55464	0
scaffold_318	185860	0
scaffold_280	255236	0
scaffold_681	59506	0
scaffold_839	45457	0
scaffold_382	123896	0
scaffold_891	38664	0
scaffold_220	585200	2
scaffold_590	70208	0
scaffold_796	49836	0
scaffold_754	52552	0
scaffold_597	68822	0
scaffold_225	569428	0
scaffold_883	39515	0
scaffold_696	56888	0
scaffold_302	211368	0
scaffold_518	81066	0
scaffold_890	38859	0
scaffold_889	38916	0
scaffold_360	137346	0
scaffold_917	18939	0
scaffold_791	50028	0
scaffold_726	54417	0
scaffold_866	42183	0
scaffold_355	140555	0
scaffold_231	512900	0
scaffold_577	71682	0
scaffold_846	44905	0
scaffold_487	86683	0
scaffold_741	53193	0
scaffold_339	152107	0
scaffold_912	21575	0
scaffold_504	83068	0
scaffold_490	86054	0
scaffold_386	121265	0
scaffold_720	54878	0
scaffold_694	57225	0
scaffold_724	54655	0
scaffold_444	97409	0
scaffold_438	98589	0
scaffold_324	171737	0
scaffold_709	55603	0
scaffold_855	43792	0
scaffold_343	149366	0
scaffold_676	60200	0
scaffold_803	49188	0
scaffold_508	82267	0
scaffold_761	51777	0
scaffold_646	63290	0
scaffold_591	70155	0
scaffold_283	248635	0
scaffold_800	49538	0
scaffold_868	42030	0
scaffold_622	66173	0
scaffold_853	44034	0
scaffold_913	21339	0
scaffold_856	43764	0
scaffold_656	62029	0
scaffold_786	50378	0
scaffold_609	67178	0
scaffold_826	46536	0
scaffold_602	67474	0
scaffold_212	673672	1
scaffold_607	67399	0
scaffold_426	102070	0
scaffold_452	96221	0
scaffold_451	96286	0
scaffold_416	104963	0
scaffold_652	62700	0
scaffold_811	48593	0
scaffold_770	51302	0
scaffold_667	60915	0
scaffold_495	85258	0
scaffold_697	56834	0
scaffold_297	220602	0
scaffold_485	86852	0
scaffold_524	80585	0
scaffold_884	39405	0
scaffold_390	119813	0
scaffold_892	38572	0
scaffold_528	79806	0
scaffold_692	57454	0
scaffold_545	77283	0
scaffold_731	54053	0
scaffold_738	53540	0
scaffold_867	42070	0
scaffold_441	97939	0
scaffold_474	89292	0
scaffold_289	234810	0
scaffold_684	58603	0
scaffold_533	78334	0
scaffold_349	145298	0
scaffold_589	70354	0
scaffold_813	47922	0
scaffold_628	65946	0
scaffold_599	68009	0
scaffold_717	55048	0
scaffold_774	50994	0
scaffold_772	51210	0
scaffold_249	280603	0
scaffold_401	110497	0
scaffold_744	53050	0
scaffold_361	136552	0
scaffold_430	101361	0
scaffold_557	74716	0
scaffold_357	138087	0
scaffold_368	132185	0
scaffold_854	43803	0
scaffold_666	61047	0
scaffold_550	76318	0
scaffold_572	72602	0
scaffold_423	102736	0
scaffold_376	126757	1
scaffold_210	677476	3
scaffold_362	135704	0
scaffold_392	116754	0
scaffold_614	66911	0
scaffold_769	51318	0
scaffold_804	49076	0
scaffold_896	38236	0
scaffold_693	57248	0
scaffold_466	90971	0
scaffold_805	49013	0
scaffold_910	26333	0
scaffold_633	65578	0
scaffold_902	35923	0
scaffold_687	58139	0
scaffold_600	67635	0
scaffold_274	262636	0
scaffold_271	267613	0
scaffold_418	104339	0
scaffold_447	96912	0
scaffold_560	73858	0
scaffold_130	1654043	0
scaffold_258	322154	0
scaffold_306	205087	0
scaffold_473	89578	0
scaffold_358	137443	0
scaffold_688	58127	0
scaffold_405	107027	0
scaffold_837	45576	0
scaffold_549	76929	0
scaffold_722	54714	0
scaffold_821	46864	0
scaffold_773	51014	0
scaffold_640	63898	0
scaffold_478	88282	0
scaffold_332	157558	0
scaffold_375	127320	0
scaffold_295	225311	0
scaffold_888	39029	0
scaffold_771	51223	0
scaffold_293	227073	0
scaffold_763	51699	0
scaffold_567	72939	0
scaffold_489	86231	0
scaffold_322	175105	0
scaffold_691	57535	0
scaffold_443	97504	0
scaffold_234	494969	0
scaffold_728	54234	0
scaffold_680	59547	0
scaffold_737	53569	0
scaffold_431	101307	0
scaffold_679	59573	0
scaffold_190	856417	0
scaffold_547	77048	0
scaffold_781	50761	0
scaffold_525	80472	0
scaffold_624	66088	0
scaffold_736	53666	0
scaffold_860	43180	0
scaffold_342	150051	0
scaffold_580	71329	0
scaffold_818	47463	0
scaffold_700	56563	0
scaffold_531	79123	0
scaffold_380	125365	1
scaffold_499	84036	0
scaffold_292	230526	0
scaffold_264	292263	0
scaffold_869	41926	0
scaffold_563	73431	0
scaffold_433	99994	0
scaffold_764	51592	0
scaffold_873	40830	0
scaffold_450	96561	0
scaffold_797	49590	0
scaffold_827	46502	0
scaffold_673	60606	0
scaffold_409	106087	0
scaffold_353	141673	1
scaffold_862	42712	0
scaffold_768	51406	0
scaffold_255	344771	0
scaffold_291	233449	0
scaffold_915	20778	0
scaffold_454	94179	0
scaffold_479	87993	0
scaffold_421	103545	0
scaffold_530	79161	0
scaffold_484	86935	0
scaffold_461	92965	0
scaffold_335	155035	0
scaffold_618	66629	0
scaffold_793	50004	0
scaffold_852	44338	0
scaffold_333	155695	0
scaffold_649	62912	0
scaffold_119	1886234	0
scaffold_783	50614	0
scaffold_587	70502	0
scaffold_341	150526	0
scaffold_911	21575	0
scaffold_505	82797	0
scaffold_876	40363	0
scaffold_275	262149	1
scaffold_424	102725	0
scaffold_894	38311	0
scaffold_407	106545	0
scaffold_272	264701	0
scaffold_627	65972	0
scaffold_428	101587	0
scaffold_281	254303	0
scaffold_526	80423	0
scaffold_885	39375	0
scaffold_753	52574	0
scaffold_838	45518	0
scaffold_432	101196	0
scaffold_778	50842	0
scaffold_790	50136	0
scaffold_85	2864942	5
scaffold_648	63163	0
scaffold_410	105939	0
scaffold_464	91693	0
scaffold_246	390127	0
scaffold_851	44464	0
scaffold_523	80662	0
scaffold_626	65977	0
scaffold_564	73398	0
scaffold_177	920589	1
scaffold_701	56454	0
scaffold_735	53784	0
scaffold_140	1504970	0
scaffold_733	53954	0
scaffold_712	55305	0
scaffold_384	122711	0
scaffold_665	61072	0
scaffold_413	105655	0
scaffold_219	586704	3
scaffold_879	39974	0
scaffold_519	81046	0
scaffold_636	64920	0
scaffold_704	55916	0
scaffold_574	72118	0
scaffold_537	77952	0
scaffold_835	45940	0
scaffold_757	52385	0
scaffold_616	66774	0
scaffold_553	75768	0
scaffold_603	67452	0
scaffold_514	81965	0
scaffold_592	70014	0
scaffold_714	55274	0
scaffold_721	54873	0
scaffold_695	56962	0
scaffold_548	76974	0
scaffold_897	38003	0
scaffold_60	4173621	9
scaffold_849	44585	0
scaffold_427	101719	0
scaffold_610	67166	0
scaffold_488	86679	0
scaffold_336	154619	0
scaffold_506	82683	0
scaffold_865	42559	0
scaffold_715	55234	0
scaffold_619	66496	0
scaffold_571	72622	0
scaffold_540	77633	0
scaffold_121	1797194	0
scaffold_404	107961	0
scaffold_235	454405	0
scaffold_877	40355	0
scaffold_807	48896	0
scaffold_719	55016	0
scaffold_381	124558	0
scaffold_903	35345	0
scaffold_492	85845	0
scaffold_561	73724	0
scaffold_529	79449	0
scaffold_585	70698	0
scaffold_270	270651	0
scaffold_439	98009	0
scaffold_276	261280	0
scaffold_213	666177	0
scaffold_329	161545	0
scaffold_829	46462	0
scaffold_881	39817	0
scaffold_323	171834	0
scaffold_419	103854	0
scaffold_282	251635	0
scaffold_245	393735	0
scaffold_747	52814	0
scaffold_182	888553	0
scaffold_371	130112	0
scaffold_352	141204	0
scaffold_320	183173	0
scaffold_372	128929	0
scaffold_596	69130	0
scaffold_309	203074	0
scaffold_798	49581	0
scaffold_516	81361	0
scaffold_850	44487	0
scaffold_493	85532	0
scaffold_186	880732	0
scaffold_338	152535	0
scaffold_820	47074	0
scaffold_237	476391	0
scaffold_806	48905	0
scaffold_435	99302	0
scaffold_395	113718	0
scaffold_864	42692	0
scaffold_299	217487	0
scaffold_716	55069	0
scaffold_705	55839	0
scaffold_406	106850	0
scaffold_647	63170	0
scaffold_191	844186	0
scaffold_228	555235	0
scaffold_365	134456	0
scaffold_586	70674	0
scaffold_267	277254	0
scaffold_348	145500	0
scaffold_634	65485	0
scaffold_227	522437	0
scaffold_766	51503	0
scaffold_880	39872	0
scaffold_261	303798	0
scaffold_377	125912	0
scaffold_469	90580	0
scaffold_308	203669	0
scaffold_189	858942	0
scaffold_510	82227	0
scaffold_639	64214	0
scaffold_660	61409	0
scaffold_906	32709	0
scaffold_683	59231	0
scaffold_286	242555	0
scaffold_814	47783	0
scaffold_817	47672	0
scaffold_588	70452	0
scaffold_762	51766	0
scaffold_698	56830	0
scaffold_782	50643	0
scaffold_662	61281	0
scaffold_262	304122	1
scaffold_581	71243	0
scaffold_458	93136	0
scaffold_900	36806	0
scaffold_630	65791	0
scaffold_816	47711	0
scaffold_546	77258	0
scaffold_777	50843	0
scaffold_446	96921	0
scaffold_678	59675	0
scaffold_659	61444	0
scaffold_344	149048	0
scaffold_398	111993	1
scaffold_785	50387	0
scaffold_776	50882	0
scaffold_601	67541	0
scaffold_538	77923	0
scaffold_775	50960	0
scaffold_584	70700	0
scaffold_809	48819	0
scaffold_642	63713	0
scaffold_482	87406	0
scaffold_859	43364	0
scaffold_337	152934	0
scaffold_317	186717	0
scaffold_486	86814	0
scaffold_565	73249	0
scaffold_655	62098	0
scaffold_500	83936	0
scaffold_316	189006	0
scaffold_480	87896	0
scaffold_878	40299	0
scaffold_411	105721	0
scaffold_843	45209	0
scaffold_169	996466	0
scaffold_799	49560	0
scaffold_364	134875	0
scaffold_300	215874	0
scaffold_367	132685	0
scaffold_858	43642	0
scaffold_462	92950	0
scaffold_669	60844	0
scaffold_507	82615	0
scaffold_463	92854	0
scaffold_391	118620	0
scaffold_686	58357	0
scaffold_393	116169	0
scaffold_593	69911	0
scaffold_448	96863	0

## Sheet: Gaps and contigs, 32 chr
Chr	Length	Gaps	Contigs	Final Hi-C scaffold
ChrY	47748341	9	10	8		Total gaps	486
OmyA01	95772356	15	16	7		Total tigs	1228
OmyA02	103806877	12	13	7		Total unplaced scaffolds	710
OmyA03	85311031	8	9	6		Total placed scaffolds	228
OmyA04_Omy04q	46841314	4	5	5		Total Scaffolds	938
OmyA05	100798064	25	26	10
OmyA06	101096859	13	14	6
OmyA07	90918291	25	26	17
OmyA08	91622588	14	15	7
OmyA09	79455637	20	21	9
OmyA10	87811138	29	30	11
OmyA11	86280908	17	18	6
OmyA12	102853256	19	20	9
OmyA13	73332040	20	21	12
OmyA14_Omy14q	43310081	8	9	4
OmyA15	81569517	18	19	10
OmyA16	78541548	17	18	12
OmyA17	95212422	24	25	15
OmyA18	74657750	25	26	6
OmyA19	67237266	15	16	8
OmyA20	46616863	12	13	4
OmyA21	64935962	20	21	12
OmyA22	52474311	8	9	4
OmyA23	62880378	4	5	5
OmyA24	45930806	10	11	5
OmyA25_Omy25q	47542702	6	7	1
OmyA26	51113553	12	13	5
OmyA27	51556237	7	8	4
OmyA28	43716683	4	5	2
OmyA30_Omy04p	46327593	4	5	4
OmyA31_Omy25p	44108611	6	7	2
OmyA32_Omy14p	41837469	8	9	5
Sum	2233218452	438	470	228
Min	41837469	4	5	1
Max	103806877	29	30	17
Average	6.97881e+07	13.6875	14.6875	7.125
Unplaced Scaffolds:
scaffold_119	1886234	0	1
scaffold_120	1874749	3	4
scaffold_121	1797194	0	1
scaffold_130	1654043	0	1
scaffold_140	1504970	0	1
scaffold_144	1484196	1	2
scaffold_156	1258143	2	3
scaffold_161	1125905	2	3
scaffold_164	1079841	1	2
scaffold_169	996466	0	1
scaffold_173	928286	0	1
scaffold_177	920589	1	2
scaffold_182	888553	0	1
scaffold_186	880732	0	1
scaffold_188	871358	0	1
scaffold_189	858942	0	1
scaffold_190	856417	0	1
scaffold_191	844186	0	1
scaffold_195	817877	1	2
scaffold_196	813722	0	1
scaffold_197	802530	0	1
scaffold_205	721750	0	1
scaffold_210	677476	3	4
scaffold_212	673672	1	2
scaffold_213	666177	0	1
scaffold_215	631356	0	1
scaffold_216	624742	1	2
scaffold_218	614079	0	1
scaffold_219	586704	3	4
scaffold_220	585200	2	3
scaffold_221	581096	0	1
scaffold_222	579594	0	1
scaffold_223	571058	0	1
scaffold_225	569428	0	1
scaffold_226	566240	0	1
scaffold_227	522437	0	1
scaffold_228	555235	0	1
scaffold_229	553900	0	1
scaffold_231	512900	0	1
scaffold_232	510155	0	1
scaffold_234	494969	0	1
scaffold_235	454405	0	1
scaffold_237	476391	0	1
scaffold_239	444543	0	1
scaffold_240	431231	0	1
scaffold_245	393735	0	1
scaffold_246	390127	0	1
scaffold_248	371972	0	1
scaffold_249	280603	0	1
scaffold_250	360411	0	1
scaffold_251	357920	0	1
scaffold_254	346706	0	1
scaffold_255	344771	0	1
scaffold_257	326358	0	1
scaffold_258	322154	0	1
scaffold_259	317248	0	1
scaffold_260	310465	0	1
scaffold_261	303798	0	1
scaffold_262	304122	1	2
scaffold_263	294106	1	2
scaffold_264	292263	0	1
scaffold_265	285447	0	1
scaffold_266	281602	0	1
scaffold_267	277254	0	1
scaffold_270	270651	0	1
scaffold_271	267613	0	1
scaffold_272	264701	0	1
scaffold_273	263776	0	1
scaffold_274	262636	0	1
scaffold_275	262149	1	2
scaffold_276	261280	0	1
scaffold_277	258486	0	1
scaffold_278	257264	0	1
scaffold_279	256012	0	1
scaffold_280	255236	0	1
scaffold_281	254303	0	1
scaffold_282	251635	0	1
scaffold_283	248635	0	1
scaffold_284	244422	0	1
scaffold_286	242555	0	1
scaffold_287	241564	0	1
scaffold_289	234810	0	1
scaffold_291	233449	0	1
scaffold_292	230526	0	1
scaffold_293	227073	0	1
scaffold_295	225311	0	1
scaffold_296	224729	0	1
scaffold_297	220602	0	1
scaffold_298	217504	0	1
scaffold_299	217487	0	1
scaffold_300	215874	0	1
scaffold_302	211368	0	1
scaffold_303	209781	0	1
scaffold_304	209243	0	1
scaffold_305	208685	0	1
scaffold_306	205087	0	1
scaffold_307	204828	1	2
scaffold_308	203669	0	1
scaffold_309	203074	0	1
scaffold_310	199767	0	1
scaffold_311	198720	1	2
scaffold_312	196600	0	1
scaffold_313	195254	0	1
scaffold_314	194312	0	1
scaffold_315	191184	0	1
scaffold_316	189006	0	1
scaffold_317	186717	0	1
scaffold_318	185860	0	1
scaffold_319	184161	0	1
scaffold_320	183173	0	1
scaffold_321	177119	0	1
scaffold_322	175105	0	1
scaffold_323	171834	0	1
scaffold_324	171737	0	1
scaffold_325	169868	0	1
scaffold_326	167894	0	1
scaffold_327	165328	0	1
scaffold_329	161545	0	1
scaffold_330	159840	0	1
scaffold_331	158634	0	1
scaffold_332	157558	0	1
scaffold_333	155695	0	1
scaffold_334	155961	1	2
scaffold_335	155035	0	1
scaffold_336	154619	0	1
scaffold_337	152934	0	1
scaffold_338	152535	0	1
scaffold_339	152107	0	1
scaffold_340	150573	0	1
scaffold_341	150526	0	1
scaffold_342	150051	0	1
scaffold_343	149366	0	1
scaffold_344	149048	0	1
scaffold_345	147973	0	1
scaffold_346	147786	0	1
scaffold_347	146588	0	1
scaffold_348	145500	0	1
scaffold_349	145298	0	1
scaffold_350	144079	0	1
scaffold_351	143538	0	1
scaffold_352	141204	0	1
scaffold_353	141673	1	2
scaffold_354	140667	0	1
scaffold_355	140555	0	1
scaffold_356	140274	0	1
scaffold_357	138087	0	1
scaffold_358	137443	0	1
scaffold_359	137370	0	1
scaffold_360	137346	0	1
scaffold_361	136552	0	1
scaffold_362	135704	0	1
scaffold_363	135021	0	1
scaffold_364	134875	0	1
scaffold_365	134456	0	1
scaffold_367	132685	0	1
scaffold_368	132185	0	1
scaffold_369	130945	0	1
scaffold_370	130661	0	1
scaffold_371	130112	0	1
scaffold_372	128929	0	1
scaffold_373	128363	0	1
scaffold_374	128338	0	1
scaffold_375	127320	0	1
scaffold_376	126757	1	2
scaffold_377	125912	0	1
scaffold_378	125538	0	1
scaffold_379	124963	0	1
scaffold_380	125365	1	2
scaffold_381	124558	0	1
scaffold_382	123896	0	1
scaffold_383	122820	0	1
scaffold_384	122711	0	1
scaffold_385	122212	0	1
scaffold_386	121265	0	1
scaffold_387	121989	2	3
scaffold_388	120378	0	1
scaffold_389	120338	0	1
scaffold_390	119813	0	1
scaffold_391	118620	0	1
scaffold_392	116754	0	1
scaffold_393	116169	0	1
scaffold_394	114294	0	1
scaffold_395	113718	0	1
scaffold_396	113066	0	1
scaffold_397	112470	0	1
scaffold_398	111993	1	2
scaffold_399	111414	0	1
scaffold_400	110863	0	1
scaffold_401	110497	0	1
scaffold_402	110234	0	1
scaffold_403	108808	0	1
scaffold_404	107961	0	1
scaffold_405	107027	0	1
scaffold_406	106850	0	1
scaffold_407	106545	0	1
scaffold_408	106154	0	1
scaffold_409	106087	0	1
scaffold_410	105939	0	1
scaffold_411	105721	0	1
scaffold_412	105708	0	1
scaffold_413	105655	0	1
scaffold_414	105138	0	1
scaffold_415	105121	0	1
scaffold_416	104963	0	1
scaffold_417	104529	0	1
scaffold_418	104339	0	1
scaffold_419	103854	0	1
scaffold_420	103772	0	1
scaffold_421	103545	0	1
scaffold_422	103386	0	1
scaffold_423	102736	0	1
scaffold_424	102725	0	1
scaffold_425	102239	0	1
scaffold_426	102070	0	1
scaffold_427	101719	0	1
scaffold_428	101587	0	1
scaffold_429	101565	0	1
scaffold_430	101361	0	1
scaffold_431	101307	0	1
scaffold_432	101196	0	1
scaffold_433	99994	0	1
scaffold_434	99895	0	1
scaffold_435	99302	0	1
scaffold_436	98706	0	1
scaffold_437	98619	0	1
scaffold_438	98589	0	1
scaffold_439	98009	0	1
scaffold_440	97985	0	1
scaffold_441	97939	0	1
scaffold_442	97813	0	1
scaffold_443	97504	0	1
scaffold_444	97409	0	1
scaffold_445	97014	0	1
scaffold_446	96921	0	1
scaffold_447	96912	0	1
scaffold_448	96863	0	1
scaffold_449	96615	0	1
scaffold_450	96561	0	1
scaffold_451	96286	0	1
scaffold_452	96221	0	1
scaffold_453	96219	0	1
scaffold_454	94179	0	1
scaffold_455	93948	0	1
scaffold_456	93578	0	1
scaffold_457	93501	0	1
scaffold_458	93136	0	1
scaffold_459	93106	0	1
scaffold_460	93020	0	1
scaffold_461	92965	0	1
scaffold_462	92950	0	1
scaffold_463	92854	0	1
scaffold_464	91693	0	1
scaffold_465	91061	0	1
scaffold_466	90971	0	1
scaffold_467	90766	0	1
scaffold_468	90601	0	1
scaffold_469	90580	0	1
scaffold_470	90322	0	1
scaffold_471	90136	0	1
scaffold_472	89681	0	1
scaffold_473	89578	0	1
scaffold_474	89292	0	1
scaffold_475	88827	0	1
scaffold_476	88652	0	1
scaffold_477	88551	0	1
scaffold_478	88282	0	1
scaffold_479	87993	0	1
scaffold_480	87896	0	1
scaffold_481	87812	0	1
scaffold_482	87406	0	1
scaffold_483	86938	0	1
scaffold_484	86935	0	1
scaffold_485	86852	0	1
scaffold_486	86814	0	1
scaffold_487	86683	0	1
scaffold_488	86679	0	1
scaffold_489	86231	0	1
scaffold_490	86054	0	1
scaffold_491	85853	0	1
scaffold_492	85845	0	1
scaffold_493	85532	0	1
scaffold_494	85431	0	1
scaffold_495	85258	0	1
scaffold_496	85183	0	1
scaffold_497	84788	0	1
scaffold_498	84774	0	1
scaffold_499	84036	0	1
scaffold_500	83936	0	1
scaffold_501	83591	0	1
scaffold_502	83095	0	1
scaffold_503	83072	0	1
scaffold_504	83068	0	1
scaffold_505	82797	0	1
scaffold_506	82683	0	1
scaffold_507	82615	0	1
scaffold_508	82267	0	1
scaffold_509	82240	0	1
scaffold_510	82227	0	1
scaffold_511	82160	0	1
scaffold_512	82151	0	1
scaffold_513	82004	0	1
scaffold_514	81965	0	1
scaffold_515	81827	0	1
scaffold_516	81361	0	1
scaffold_517	81355	0	1
scaffold_518	81066	0	1
scaffold_519	81046	0	1
scaffold_520	80988	0	1
scaffold_521	80944	0	1
scaffold_522	80763	0	1
scaffold_523	80662	0	1
scaffold_524	80585	0	1
scaffold_525	80472	0	1
scaffold_526	80423	0	1
scaffold_527	79825	0	1
scaffold_528	79806	0	1
scaffold_529	79449	0	1
scaffold_530	79161	0	1
scaffold_531	79123	0	1
scaffold_532	78961	0	1
scaffold_533	78334	0	1
scaffold_534	78253	0	1
scaffold_535	78124	0	1
scaffold_536	77982	0	1
scaffold_537	77952	0	1
scaffold_538	77923	0	1
scaffold_539	77780	0	1
scaffold_540	77633	0	1
scaffold_541	77597	0	1
scaffold_542	77519	0	1
scaffold_543	77482	0	1
scaffold_544	77457	0	1
scaffold_545	77283	0	1
scaffold_546	77258	0	1
scaffold_547	77048	0	1
scaffold_548	76974	0	1
scaffold_549	76929	0	1
scaffold_550	76318	0	1
scaffold_551	76194	0	1
scaffold_552	75985	0	1
scaffold_553	75768	0	1
scaffold_554	75678	0	1
scaffold_555	75599	0	1
scaffold_556	74810	0	1
scaffold_557	74716	0	1
scaffold_558	74634	0	1
scaffold_559	74205	0	1
scaffold_560	73858	0	1
scaffold_561	73724	0	1
scaffold_562	73454	0	1
scaffold_563	73431	0	1
scaffold_564	73398	0	1
scaffold_565	73249	0	1
scaffold_566	72945	0	1
scaffold_567	72939	0	1
scaffold_568	72749	0	1
scaffold_569	72707	0	1
scaffold_570	72700	0	1
scaffold_571	72622	0	1
scaffold_572	72602	0	1
scaffold_573	72436	0	1
scaffold_574	72118	0	1
scaffold_575	72084	0	1
scaffold_576	72069	0	1
scaffold_577	71682	0	1
scaffold_578	71406	0	1
scaffold_579	71354	0	1
scaffold_580	71329	0	1
scaffold_581	71243	0	1
scaffold_582	70886	0	1
scaffold_583	70742	0	1
scaffold_584	70700	0	1
scaffold_585	70698	0	1
scaffold_586	70674	0	1
scaffold_587	70502	0	1
scaffold_588	70452	0	1
scaffold_589	70354	0	1
scaffold_590	70208	0	1
scaffold_591	70155	0	1
scaffold_592	70014	0	1
scaffold_593	69911	0	1
scaffold_594	69189	0	1
scaffold_595	69186	0	1
scaffold_596	69130	0	1
scaffold_597	68822	0	1
scaffold_598	68655	0	1
scaffold_599	68009	0	1
scaffold_60	4173621	9	10
scaffold_600	67635	0	1
scaffold_601	67541	0	1
scaffold_602	67474	0	1
scaffold_603	67452	0	1
scaffold_604	67436	0	1
scaffold_605	67423	0	1
scaffold_606	67416	0	1
scaffold_607	67399	0	1
scaffold_608	67228	0	1
scaffold_609	67178	0	1
scaffold_610	67166	0	1
scaffold_611	67143	0	1
scaffold_612	67071	0	1
scaffold_613	67041	0	1
scaffold_614	66911	0	1
scaffold_615	66790	0	1
scaffold_616	66774	0	1
scaffold_617	66683	0	1
scaffold_618	66629	0	1
scaffold_619	66496	0	1
scaffold_620	66311	0	1
scaffold_621	66265	0	1
scaffold_622	66173	0	1
scaffold_623	66101	0	1
scaffold_624	66088	0	1
scaffold_625	66010	0	1
scaffold_626	65977	0	1
scaffold_627	65972	0	1
scaffold_628	65946	0	1
scaffold_629	65890	0	1
scaffold_630	65791	0	1
scaffold_631	65671	0	1
scaffold_632	65658	0	1
scaffold_633	65578	0	1
scaffold_634	65485	0	1
scaffold_635	65448	0	1
scaffold_636	64920	0	1
scaffold_637	64613	0	1
scaffold_638	64234	0	1
scaffold_639	64214	0	1
scaffold_640	63898	0	1
scaffold_641	63845	0	1
scaffold_642	63713	0	1
scaffold_643	63630	0	1
scaffold_644	63458	0	1
scaffold_645	63321	0	1
scaffold_646	63290	0	1
scaffold_647	63170	0	1
scaffold_648	63163	0	1
scaffold_649	62912	0	1
scaffold_650	62871	0	1
scaffold_651	62707	0	1
scaffold_652	62700	0	1
scaffold_653	62623	0	1
scaffold_654	62587	0	1
scaffold_655	62098	0	1
scaffold_656	62029	0	1
scaffold_657	62018	0	1
scaffold_658	61710	0	1
scaffold_659	61444	0	1
scaffold_660	61409	0	1
scaffold_661	61341	0	1
scaffold_662	61281	0	1
scaffold_663	61258	0	1
scaffold_664	61116	0	1
scaffold_665	61072	0	1
scaffold_666	61047	0	1
scaffold_667	60915	0	1
scaffold_668	60896	0	1
scaffold_669	60844	0	1
scaffold_670	60723	0	1
scaffold_671	60651	0	1
scaffold_672	60642	0	1
scaffold_673	60606	0	1
scaffold_674	60570	0	1
scaffold_675	60207	0	1
scaffold_676	60200	0	1
scaffold_677	59960	0	1
scaffold_678	59675	0	1
scaffold_679	59573	0	1
scaffold_680	59547	0	1
scaffold_681	59506	0	1
scaffold_682	59301	0	1
scaffold_683	59231	0	1
scaffold_684	58603	0	1
scaffold_685	58597	0	1
scaffold_686	58357	0	1
scaffold_687	58139	0	1
scaffold_688	58127	0	1
scaffold_689	57917	0	1
scaffold_690	57910	0	1
scaffold_691	57535	0	1
scaffold_692	57454	0	1
scaffold_693	57248	0	1
scaffold_694	57225	0	1
scaffold_695	56962	0	1
scaffold_696	56888	0	1
scaffold_697	56834	0	1
scaffold_698	56830	0	1
scaffold_699	56779	0	1
scaffold_700	56563	0	1
scaffold_701	56454	0	1
scaffold_702	56112	0	1
scaffold_703	55963	0	1
scaffold_704	55916	0	1
scaffold_705	55839	0	1
scaffold_706	55752	0	1
scaffold_707	55746	0	1
scaffold_708	55627	0	1
scaffold_709	55603	0	1
scaffold_710	55572	0	1
scaffold_711	55464	0	1
scaffold_712	55305	0	1
scaffold_713	55279	0	1
scaffold_714	55274	0	1
scaffold_715	55234	0	1
scaffold_716	55069	0	1
scaffold_717	55048	0	1
scaffold_718	55044	0	1
scaffold_719	55016	0	1
scaffold_720	54878	0	1
scaffold_721	54873	0	1
scaffold_722	54714	0	1
scaffold_723	54680	0	1
scaffold_724	54655	0	1
scaffold_725	54428	0	1
scaffold_726	54417	0	1
scaffold_727	54275	0	1
scaffold_728	54234	0	1
scaffold_729	54173	0	1
scaffold_730	54164	0	1
scaffold_731	54053	0	1
scaffold_732	54009	0	1
scaffold_733	53954	0	1
scaffold_734	53943	0	1
scaffold_735	53784	0	1
scaffold_736	53666	0	1
scaffold_737	53569	0	1
scaffold_738	53540	0	1
scaffold_739	53387	0	1
scaffold_740	53228	0	1
scaffold_741	53193	0	1
scaffold_742	53072	0	1
scaffold_743	53063	0	1
scaffold_744	53050	0	1
scaffold_745	53007	0	1
scaffold_746	52941	0	1
scaffold_747	52814	0	1
scaffold_748	52744	0	1
scaffold_749	52707	0	1
scaffold_750	52678	0	1
scaffold_751	52616	0	1
scaffold_752	52577	0	1
scaffold_753	52574	0	1
scaffold_754	52552	0	1
scaffold_755	52449	0	1
scaffold_756	52441	0	1
scaffold_757	52385	0	1
scaffold_758	52338	0	1
scaffold_759	52256	0	1
scaffold_760	52151	0	1
scaffold_761	51777	0	1
scaffold_762	51766	0	1
scaffold_763	51699	0	1
scaffold_764	51592	0	1
scaffold_765	51523	0	1
scaffold_766	51503	0	1
scaffold_767	51491	0	1
scaffold_768	51406	0	1
scaffold_769	51318	0	1
scaffold_770	51302	0	1
scaffold_771	51223	0	1
scaffold_772	51210	0	1
scaffold_773	51014	0	1
scaffold_774	50994	0	1
scaffold_775	50960	0	1
scaffold_776	50882	0	1
scaffold_777	50843	0	1
scaffold_778	50842	0	1
scaffold_779	50828	0	1
scaffold_780	50810	0	1
scaffold_781	50761	0	1
scaffold_782	50643	0	1
scaffold_783	50614	0	1
scaffold_784	50485	0	1
scaffold_785	50387	0	1
scaffold_786	50378	0	1
scaffold_787	50374	0	1
scaffold_788	50217	0	1
scaffold_789	50205	0	1
scaffold_790	50136	0	1
scaffold_791	50028	0	1
scaffold_792	50021	0	1
scaffold_793	50004	0	1
scaffold_794	49974	0	1
scaffold_795	49928	0	1
scaffold_796	49836	0	1
scaffold_797	49590	0	1
scaffold_798	49581	0	1
scaffold_799	49560	0	1
scaffold_800	49538	0	1
scaffold_801	49330	0	1
scaffold_802	49294	0	1
scaffold_803	49188	0	1
scaffold_804	49076	0	1
scaffold_805	49013	0	1
scaffold_806	48905	0	1
scaffold_807	48896	0	1
scaffold_808	48893	0	1
scaffold_809	48819	0	1
scaffold_810	48776	0	1
scaffold_811	48593	0	1
scaffold_812	48305	0	1
scaffold_813	47922	0	1
scaffold_814	47783	0	1
scaffold_815	47738	0	1
scaffold_816	47711	0	1
scaffold_817	47672	0	1
scaffold_818	47463	0	1
scaffold_819	47202	0	1
scaffold_820	47074	0	1
scaffold_821	46864	0	1
scaffold_822	46705	0	1
scaffold_823	46704	0	1
scaffold_824	46699	0	1
scaffold_825	46581	0	1
scaffold_826	46536	0	1
scaffold_827	46502	0	1
scaffold_828	46496	0	1
scaffold_829	46462	0	1
scaffold_830	46447	0	1
scaffold_831	46316	0	1
scaffold_832	46176	0	1
scaffold_833	46049	0	1
scaffold_834	46014	0	1
scaffold_835	45940	0	1
scaffold_836	45842	0	1
scaffold_837	45576	0	1
scaffold_838	45518	0	1
scaffold_839	45457	0	1
scaffold_840	45439	0	1
scaffold_841	45346	0	1
scaffold_842	45307	0	1
scaffold_843	45209	0	1
scaffold_844	45133	0	1
scaffold_845	45032	0	1
scaffold_846	44905	0	1
scaffold_847	44634	0	1
scaffold_848	44591	0	1
scaffold_849	44585	0	1
scaffold_85	2864942	5	6
scaffold_850	44487	0	1
scaffold_851	44464	0	1
scaffold_852	44338	0	1
scaffold_853	44034	0	1
scaffold_854	43803	0	1
scaffold_855	43792	0	1
scaffold_856	43764	0	1
scaffold_857	43723	0	1
scaffold_858	43642	0	1
scaffold_859	43364	0	1
scaffold_860	43180	0	1
scaffold_861	42857	0	1
scaffold_862	42712	0	1
scaffold_863	42707	0	1
scaffold_864	42692	0	1
scaffold_865	42559	0	1
scaffold_866	42183	0	1
scaffold_867	42070	0	1
scaffold_868	42030	0	1
scaffold_869	41926	0	1
scaffold_87	2745910	1	2
scaffold_870	41275	0	1
scaffold_871	41206	0	1
scaffold_872	40937	0	1
scaffold_873	40830	0	1
scaffold_874	40536	0	1
scaffold_875	40506	0	1
scaffold_876	40363	0	1
scaffold_877	40355	0	1
scaffold_878	40299	0	1
scaffold_879	39974	0	1
scaffold_880	39872	0	1
scaffold_881	39817	0	1
scaffold_882	39594	0	1
scaffold_883	39515	0	1
scaffold_884	39405	0	1
scaffold_885	39375	0	1
scaffold_886	39338	0	1
scaffold_887	39315	0	1
scaffold_888	39029	0	1
scaffold_889	38916	0	1
scaffold_890	38859	0	1
scaffold_891	38664	0	1
scaffold_892	38572	0	1
scaffold_893	38371	0	1
scaffold_894	38311	0	1
scaffold_895	38263	0	1
scaffold_896	38236	0	1
scaffold_897	38003	0	1
scaffold_898	37893	0	1
scaffold_899	37569	0	1
scaffold_900	36806	0	1
scaffold_901	36369	0	1
scaffold_902	35923	0	1
scaffold_903	35345	0	1
scaffold_904	34502	0	1
scaffold_905	32735	0	1
scaffold_906	32709	0	1
scaffold_907	31915	0	1
scaffold_908	30918	0	1
scaffold_909	28300	0	1
scaffold_910	26333	0	1
scaffold_911	21575	0	1
scaffold_912	21575	0	1
scaffold_913	21339	0	1
scaffold_914	21198	0	1
scaffold_915	20778	0	1
scaffold_916	20663	0	1
scaffold_917	18939	0	1
scaffold_918	18911	0	1
scaffold_919	16956	0	1
